# Supplementary material for: Solvatochromism and linear solvation energy relationship of diol- and proline-functionalized azo dyes using the Kamlet–Taft and Catalán solvent parameter sets
Source: Royal Society of Chemistry journal article supplement (doi:10.1039/b809055f), 2008-01-01
Supplement: b809055f.pdf [file b809055f.pdf]

*Supporting Information*

**Solvatochromism and linear solvation energy relationship of diol- and proline-  
functionalized azo dyes using the KAMLET–TAFT and CATALÁN solvent  
parameter sets**

Katja Hofmann,<sup>[a]</sup> Katja Schreiter,<sup>[a]</sup> Andreas Seifert,<sup>[a]</sup> Tobias Ruffer,<sup>[b]</sup> Heinrich Lang,<sup>[b]</sup> and  
Stefan Spange<sup>[a]\*</sup>

<sup>[a]</sup> Department of Polymer Chemistry, Institute of Chemistry, Chemnitz University of  
Technology, Strasse der Nationen 62, 09111 Chemnitz, Germany  
*E-mail address:* stefan.spange@chemie.tu-chemnitz.de

<sup>[b]</sup> Department of Inorganic Chemistry, Institute of Chemistry, Chemnitz University of  
Technology, Strasse der Nationen 62, 09111 Chemnitz, Germany

To whom correspondence pertaining to X-ray structure analyses should be addressed.

## Solvent Parameter Sets:

**Table S1.** KAMLET–TAFT<sup>[S1]</sup> and CATALÁN<sup>[S2,3]</sup> parameter set.

| solvent                       | KAMLET–TAFT parameter |         |         | CATALÁN parameter <sup>a,b</sup> |           |            |           |
|-------------------------------|-----------------------|---------|---------|----------------------------------|-----------|------------|-----------|
|                               | $\alpha$              | $\beta$ | $\pi^*$ | <i>SA</i>                        | <i>SB</i> | <i>SPP</i> | <i>SP</i> |
| cyclohexane                   | 0.00                  | 0.00    | 0.00    | 0.000                            | 0.073     | 0.557      | 0.6830    |
| <i>n</i> -hexane              | 0.00                  | 0.00    | −0.04   | 0.000                            | 0.056     | 0.519      | 0.6164    |
| triethylamine                 | 0.00                  | 0.71    | 0.14    | 0.000                            | 0.885     | 0.617      | 0.6603    |
| tetrachloromethane            | 0.00                  | 0.10    | 0.28    | 0.000                            | 0.044     | 0.632      | 0.7677    |
| toluene                       | 0.00                  | 0.11    | 0.54    | 0.000                            | 0.128     | 0.655      | 0.7816    |
| benzene                       | 0.00                  | 0.10    | 0.59    | 0.000                            | 0.124     | 0.667      | 0.7929    |
| diethyl ether                 | 0.00                  | 0.47    | 0.27    | 0.000                            | 0.562     | 0.694      | 0.6167    |
| 1,4-dioxane                   | 0.00                  | 0.37    | 0.55    | 0.000                            | 0.444     | 0.701      | 0.7374    |
| anisole                       | 0.00                  | 0.32    | 0.73    | 0.084                            | 0.299     | 0.823      | 0.8204    |
| tetrahydrofuran               | 0.00                  | 0.55    | 0.58    | 0.000                            | 0.591     | 0.838      | 0.7139    |
| ethyl acetate                 | 0.00                  | 0.45    | 0.55    | 0.000                            | 0.542     | 0.795      | 0.6558    |
| chloroform                    | 0.20                  | 0.10    | 0.53    | 0.047                            | 0.071     | 0.786      | 0.7833    |
| pyridine                      | 0.00                  | 0.64    | 0.87    | 0.033                            | 0.581     | 0.922      | 0.8416    |
| dichloromethane               | 0.13                  | 0.10    | 0.82    | 0.040                            | 0.178     | 0.876      | 0.7612    |
| 1,2-dichloroethane            | 0.00                  | 0.10    | 0.81    | 0.030                            | 0.126     | 0.890      | 0.7711    |
| benzotrile                    | 0.00                  | 0.37    | 0.90    | 0.047                            | 0.281     | 0.960      | 0.8507    |
| acetone                       | 0.08                  | 0.43    | 0.71    | 0.000                            | 0.475     | 0.881      | 0.6510    |
| <i>N,N</i> -dimethylacetamide | 0.00                  | 0.76    | 0.88    | 0.028                            | 0.650     | 0.930      | 0.7632    |
| <i>N,N</i> -dimethylformamide | 0.00                  | 0.69    | 0.88    | 0.031                            | 0.613     | 0.939      | 0.7589    |
| dimethyl sulfoxide            | 0.00                  | 0.76    | 1.00    | 0.072                            | 0.647     | 1.000      | 0.8295    |
| acetonitrile                  | 0.19                  | 0.40    | 0.75    | 0.044                            | 0.286     | 0.895      | 0.6448    |
| nitromethane                  | 0.22                  | 0.06    | 0.85    | 0.078                            | 0.236     | 0.907      | 0.7096    |
| 1-decanol                     | 0.70                  | 0.82    | 0.45    | 0.259                            | 0.912     | 0.765      | 0.7221    |
| 1-butanol                     | 0.84                  | 0.84    | 0.47    | 0.341                            | 0.809     | 0.837      | 0.6742    |
| 2-propanol                    | 0.76                  | 0.84    | 0.48    | 0.283                            | 0.830     | 0.848      | 0.6334    |
| 1-propanol                    | 0.84                  | 0.90    | 0.52    | 0.367                            | 0.782     | 0.847      | 0.6581    |
| ethanol                       | 0.86                  | 0.75    | 0.54    | 0.400                            | 0.658     | 0.853      | 0.6334    |
| methanol                      | 0.98                  | 0.66    | 0.60    | 0.605                            | 0.545     | 0.857      | 0.6079    |
| 2,2,2-trifluoroethanol        | 1.51                  | 0.00    | 0.73    | 0.893                            | 0.107     | 0.908      | 0.5431    |

<sup>a</sup>*SA*, *SB*, and *SPP* values for all solvents were taken from ref. 10b.

<sup>b</sup> *SP* values for all solvents were taken from ref. 10c.

## Results of the multiple linear regression analyses:

**Table S2.** Solvent-independent correlation coefficients  $a$ ,  $b$  and  $s$  of the Kamlet–Taft parameters  $\alpha$ ,  $\beta$  and  $\pi^*$ , respectively, solute property of the reference system  $\tilde{V}_{max,0}$ , correlation coefficient ( $r$ ), significance ( $f$ ), standard deviation ( $sd$ ), and number of solvents ( $n$ ) calculated for the solvatochromism of compounds **2a** and **2c**.

| compound  | $\tilde{V}_{max,0}$       | $a$                      | $b$                       | $s$                       | $n$ | $F$     | $R$   | $SD$  |
|-----------|---------------------------|--------------------------|---------------------------|---------------------------|-----|---------|-------|-------|
| <b>2a</b> | 23.254<br>( $\pm 0.178$ ) | 0.602<br>( $\pm 0.078$ ) | -0.695<br>( $\pm 0.142$ ) | 0.248<br>( $\pm 0.215$ )  | 26  | <0.0001 | 0.892 | 0.211 |
| <b>2a</b> | 23.091<br>( $\pm 0.071$ ) | 0.607<br>( $\pm 0.113$ ) | -                         | -                         | 26  | <0.0001 | 0.731 | 0.305 |
| <b>2a</b> | 23.665<br>( $\pm 0.136$ ) | -                        | -0.784<br>( $\pm 0.248$ ) | -                         | 26  | 0.004   | 0.535 | 0.378 |
| <b>2a</b> | 23.153<br>( $\pm 0.293$ ) | -                        | -                         | 0.231<br>( $\pm 0.277$ )  | 26  | 0.599   | 0.406 | 0.444 |
| <b>2a</b> | 23.438<br>( $\pm 0.082$ ) | 0.586<br>( $\pm 0.079$ ) | -0.732<br>( $\pm 0.139$ ) | -                         | 26  | <0.0001 | 0.885 | 0.212 |
| <b>2a</b> | 22.765<br>( $\pm 0.206$ ) | 0.634<br>( $\pm 0.111$ ) | -                         | 0.489<br>( $\pm 0.292$ )  | 26  | <0.0001 | 0.763 | 0.294 |
| <b>2a</b> | 23.684<br>( $\pm 0.309$ ) | -                        | -0.788<br>( $\pm 0.259$ ) | -0.026<br>( $\pm 0.386$ ) | 26  | 0.017   | 0.445 | 0.385 |
| <b>2c</b> | 22.678<br>( $\pm 0.140$ ) | 0.555<br>( $\pm 0.091$ ) | -0.375<br>( $\pm 0.131$ ) | -0.523<br>( $\pm 0.178$ ) | 27  | <0.0001 | 0.832 | 0.189 |
| <b>2c</b> | 22.182<br>( $\pm 0.054$ ) | 0.533<br>( $\pm 0.109$ ) | -                         | -                         | 27  | <0.0001 | 0.699 | 0.234 |
| <b>2c</b> | 22.388<br>( $\pm 0.118$ ) | -                        | -0.135<br>( $\pm 0.217$ ) | -                         | 27  | 0.540   | 0.123 | 0.325 |
| <b>2c</b> | 22.715<br>( $\pm 0.184$ ) | -                        | -                         | -0.615<br>( $\pm 0.277$ ) | 27  | 0.035   | 0.406 | 0.299 |
| <b>2c</b> | 22.320<br>( $\pm 0.080$ ) | 0.588<br>( $\pm 0.104$ ) | -0.334<br>( $\pm 0.149$ ) | -                         | 27  | <0.0001 | 0.760 | 0.217 |
| <b>2c</b> | 22.487<br>( $\pm 0.141$ ) | 0.498<br>( $\pm 0.102$ ) | -                         | -0.468<br>( $\pm 0.202$ ) | 27  | <0.0001 | 0.763 | 0.216 |
| <b>2c</b> | 22.831<br>( $\pm 0.218$ ) | -                        | -0.200<br>( $\pm 0.201$ ) | -0.653<br>( $\pm 0.279$ ) | 27  | 0.071   | 0.445 | 0.300 |

**Table S3.** Solvent-independent correlation coefficients  $a$ ,  $b$  and  $s$  of the CATALÁN parameters  $SA$ ,  $SB$  and  $SPP$ , respectively, solute property of the reference system  $\tilde{V}_{max,0}$ , correlation coefficient ( $r$ ), significance ( $f$ ), standard deviation ( $sd$ ), and number of solvents ( $n$ ) calculated for the solvatochromism of compounds **2a** and **2c**.

| compound  | $\tilde{V}_{max,0}$       | $a$                      | $b$                       | $s$                       | $n$ | $F$      | $R$   | $SD$  |
|-----------|---------------------------|--------------------------|---------------------------|---------------------------|-----|----------|-------|-------|
| <b>2a</b> | 23.194<br>( $\pm 0.406$ ) | 1.116<br>( $\pm 0.217$ ) | -0.708<br>( $\pm 0.177$ ) | 0.283<br>( $\pm 0.476$ )  | 26  | <0.0001  | 0.809 | 0.233 |
| <b>2a</b> | 23.109<br>( $\pm 0.070$ ) | 1.029<br>( $\pm 0.270$ ) | -                         | -                         | 26  | 5.773E-4 | 0.614 | 0.300 |
| <b>2a</b> | 23.537<br>( $\pm 0.134$ ) | -                        | -0.626<br>( $\pm 0.257$ ) | -                         | 26  | 0.023    | 0.445 | 0.340 |
| <b>2a</b> | 22.570<br>( $\pm 0.622$ ) | -                        | -                         | 0.821<br>( $\pm 0.740$ )  | 26  | 0.299    | 0.278 | 0.370 |
| <b>2a</b> | 23.429<br>( $\pm 0.092$ ) | 1.143<br>( $\pm 0.210$ ) | -0.712<br>( $\pm 0.174$ ) | -                         | 26  | <0.0001  | 0.806 | 0.230 |
| <b>2a</b> | 22.800<br>( $\pm 0.514$ ) | 0.996<br>( $\pm 0.280$ ) | -                         | 0.376<br>( $\pm 0.612$ )  | 26  | 0.004    | 0.622 | 0.303 |
| <b>2a</b> | 22.879<br>( $\pm 0.581$ ) | -                        | -0.620<br>( $\pm 0.256$ ) | 0.7839<br>( $\pm 0.677$ ) | 26  | 0.041    | 0.492 | 0.337 |
| <b>2c</b> | 23.132<br>( $\pm 0.337$ ) | 1.128<br>( $\pm 0.200$ ) | -0.097<br>( $\pm 0.158$ ) | -1.104<br>( $\pm 0.407$ ) | 27  | <0.0001  | 0.773 | 0.217 |
| <b>2c</b> | 22.191<br>( $\pm 0.055$ ) | 0.991<br>( $\pm 0.216$ ) | -                         | -                         | 27  | 1.082E-4 | 0.676 | 0.241 |
| <b>2c</b> | 22.333<br>( $\pm 0.125$ ) | -                        | -0.015<br>( $\pm 0.235$ ) | -                         | 27  | 0.949    | 0.013 | 0.328 |
| <b>2c</b> | 22.840<br>( $\pm 0.489$ ) | -                        | -                         | -0.620<br>( $\pm 0.585$ ) | 27  | 0.299    | 0.207 | 0.321 |
| <b>2c</b> | 22.247<br>( $\pm 0.095$ ) | 1.013<br>( $\pm 0.220$ ) | -0.129<br>( $\pm 0.177$ ) | -                         | 27  | 5.038E-4 | 0.685 | 0.244 |
| <b>2c</b> | 23.105<br>( $\pm 0.329$ ) | 1.113<br>( $\pm 0.196$ ) | -                         | -1.123<br>( $\pm 0.400$ ) | 27  | <0.0001  | 0.769 | 0.214 |
| <b>2c</b> | 22.837<br>( $\pm 0.502$ ) | -                        | 0.010<br>( $\pm 0.236$ )  | -0.623<br>( $\pm 0.600$ ) | 27  | 0.590    | 0.208 | 0.327 |

**Table S4.** Solvent-independent correlation coefficients  $a$ ,  $b$  and  $s$  of the CATALÁN parameters  $SA$ ,  $SB$  and  $SP$ , respectively, solute property of the reference system  $\tilde{V}_{max,0}$ , correlation coefficient ( $r$ ), significance ( $f$ ), standard deviation ( $sd$ ), and number of solvents ( $n$ ) calculated for the solvatochromism of compounds **2a** and **2c**.

| compound  | $\tilde{V}_{max,0}$       | $a$                      | $b$                       | $s$                       | $n$ | $F$      | $R$   | $SD$  |
|-----------|---------------------------|--------------------------|---------------------------|---------------------------|-----|----------|-------|-------|
| <b>2a</b> | 25.254<br>( $\pm 0.397$ ) | 0.637<br>( $\pm 0.187$ ) | -0.835<br>( $\pm 0.129$ ) | -2.382<br>( $\pm 0.510$ ) | 26  | <0.0001  | 0.908 | 0.167 |
| <b>2a</b> | 25.254<br>( $\pm 0.525$ ) | -                        | -                         | -2.792<br>( $\pm 0.729$ ) | 26  | 8.122E-4 | 0.616 | 0.299 |
| <b>2a</b> | 24.413<br>( $\pm 0.652$ ) | 0.637<br>( $\pm 0.321$ ) | -                         | -1.743<br>( $\pm 0.868$ ) | 26  | 6.755E-4 | 0.686 | 0.282 |

|           |                    |                   |                    |                    |    |         |       |       |
|-----------|--------------------|-------------------|--------------------|--------------------|----|---------|-------|-------|
| <b>2a</b> | 26.068<br>(±0.384) | -                 | -0.855<br>(±0.156) | -3.391<br>(±0.503) | 26 | <0.0001 | 0.855 | 0.201 |
| <b>2c</b> | 25.036<br>(±0.200) | 0.235<br>(±0.091) | -0.352<br>(±0.060) | -3.594<br>(±0.254) | 27 | <0.0001 | 0.972 | 0.080 |
| <b>2c</b> | 24.939<br>(±0.226) | -                 | -                  | -3.640<br>(±0.313) | 27 | <0.0001 | 0.919 | 0.130 |
| <b>2c</b> | 24.590<br>(±0.285) | 0.263<br>(±0.140) | -                  | -3.203<br>(±0.379) | 27 | <0.0001 | 0.929 | 0.124 |
| <b>2c</b> | 25.357<br>(±0.174) | -                 | -0.360<br>(±0.067) | -3.992<br>(±0.225) | 27 | <0.0001 | 0.964 | 0.089 |

### Single crystal X-ray structure analysis:

Crystal data was collected on a Oxford Gemini Diffractometer at low temperature (100 K) using Cu- $K_{\alpha}$ -radiation ( $\lambda = 1.54 \text{ \AA}$ ). The structure was solved by direct methods using SHELXS-97<sup>S4</sup>. The structure was refined by full-matrix least squares procedures on  $F^2$ , using SHELXL-97<sup>S5</sup>. All non hydrogen atoms were refined anisotropically. All hydrogen atoms were added on calculated positions, except of OH and NH which were found in difference fourier synthesis.

**Table S5:** Crystallographic data and collection parameters for **2a**

|                                                   |                                                          |
|---------------------------------------------------|----------------------------------------------------------|
| empirical formula                                 | $C_{18}H_{20}N_6O_9$                                     |
| formula weight                                    | 464.40                                                   |
| color                                             | orange                                                   |
| wavelength ( $\text{\AA}$ )                       | 1.54184                                                  |
| temperature (K)                                   | 100 (0)                                                  |
| crystal system                                    | triclinic                                                |
| space group                                       | $P1$                                                     |
| $a$ [ $\text{\AA}$ ]                              | 6.7800 (10)                                              |
| $b$ [ $\text{\AA}$ ]                              | 8.0970 (15)                                              |
| $c$ [ $\text{\AA}$ ]                              | 19.7070 (16)                                             |
| $\alpha$ [ $^{\circ}$ ]                           | 95.732 (8)                                               |
| $\beta$ [ $^{\circ}$ ]                            | 96.607 (9)                                               |
| $\gamma$ [ $^{\circ}$ ]                           | 92.11 (6)                                                |
| volume ( $\text{\AA}^3$ )                         | 1068.0 (2)                                               |
| $Z$                                               | 2                                                        |
| calcd density ( $\text{g} \cdot \text{cm}^{-3}$ ) | 1.444                                                    |
| absorption coefficient ( $\text{mm}^{-1}$ )       | 1.012                                                    |
| $F(000)$                                          | 484                                                      |
| crystal size ( $\text{mm}^3$ )                    | 0.2 x 0.2 x 0.01                                         |
| $\Theta$ range for data collection( $^{\circ}$ )  | 4.54–60.46                                               |
| index ranges                                      | $-7 \leq h \leq 7, -8 \leq k \leq 8, -22 \leq l \leq 22$ |
| reflections collected                             | 7626                                                     |
| independent reflections                           | 3106                                                     |

|                                                     |                                    |
|-----------------------------------------------------|------------------------------------|
| $R_{\text{int}}$                                    | 0.0194                             |
| data/restraints/parameter                           | 3106/0/310                         |
| refinement method                                   | full-matrix least-squares on $F^2$ |
| goodness-of-fit on $F^2$                            | 0.941                              |
| final $R$ indicates [ $>2\sigma(I)$ ]               | $R1 = 0.0343$ , $wR2 = 0.0852$     |
| $R$ indicates all data                              | $R1 = 0.0487$ , $wR2 = 0.0917$     |
| largest diff. peak and hole ( $e^* \text{ \AA}^3$ ) | 0.192, -0.193                      |

**Table S6.** Bond lengths [Å] and angles [deg] for **2a**

|                   |            |
|-------------------|------------|
| N(3)-N(4)         | 1.2631(19) |
| N(3)-C(4)         | 1.424(2)   |
| O(1)-N(1)         | 1.2280(19) |
| O(2)-N(1)         | 1.2288(19) |
| N(1)-C(1)         | 1.468(2)   |
| N(6)-O(8)         | 1.227(2)   |
| N(6)-O(7)         | 1.2382(19) |
| N(6)-C(11)        | 1.449(2)   |
| O(3)-N(2)         | 1.2248(18) |
| N(4)-C(7)         | 1.404(2)   |
| C(11)-C(12)       | 1.386(2)   |
| C(11)-C(10)       | 1.427(2)   |
| C(7)-C(12)        | 1.379(2)   |
| C(7)-C(8)         | 1.409(2)   |
| O(4)-N(2)         | 1.2300(18) |
| N(5)-C(10)        | 1.340(2)   |
| N(5)-C(14)        | 1.456(2)   |
| C(1)-C(2)         | 1.386(2)   |
| C(1)-C(6)         | 1.389(2)   |
| C(4)-C(5)         | 1.394(2)   |
| C(4)-C(3)         | 1.404(2)   |
| C(3)-C(2)         | 1.379(2)   |
| C(3)-N(2)         | 1.470(2)   |
| C(5)-C(6)         | 1.378(2)   |
| O(6)-C(15)        | .422(3)    |
| (5)-C(13)         | 1.425(2)   |
| C(8)-C(9)         | 1.362(2)   |
| C(9)-C(10)        | 1.432(2)   |
| C(14)-C(13)       | 1.522(3)   |
| C(14)-C(15)       | 1.522(3)   |
| O(9)-C(17)        | 1.217(3)   |
| C(17)-C(16)       | 1.487(3)   |
| C(17)-C(18)       | 1.498(4)   |
|                   |            |
| N(4)-N(3)-C(4)    | 112.04(13) |
| O(1)-N(1)-O(2)    | 123.58(14) |
| O(1)-N(1)-C(1)    | 118.17(14) |
| O(2)-N(1)-C(1)    | 118.25(14) |
| O(8)-N(6)-O(7)    | 121.43(15) |
| O(8)-N(6)-C(11)   | 118.66(14) |
| O(7)-N(6)-C(11)   | 119.91(14) |
| N(3)-N(4)-C(7)    | 114.61(14) |
| C(12)-C(11)-C(10) | 121.51(16) |
| C(12)-C(11)-N(6)  | 116.48(15) |
| C(10)-C(11)-N(6)  | 122.01(14) |

|                   |            |
|-------------------|------------|
| C(12)-C(7)-N(4)   | 115.49(15) |
| C(12)-C(7)-C(8)   | 119.18(15) |
| N(4)-C(7)-C(8)    | 125.31(15) |
| C(10)-N(5)-C(14)  | 126.53(16) |
| C(2)-C(1)-C(6)    | 122.14(15) |
| C(2)-C(1)-N(1)    | 118.46(15) |
| C(6)-C(1)-N(1)    | 119.39(15) |
| C(5)-C(4)-C(3)    | 117.69(15) |
| C(5)-C(4)-N(3)    | 124.35(15) |
| C(3)-C(4)-N(3)    | 117.89(15) |
| C(2)-C(3)-C(4)    | 122.68(15) |
| C(2)-C(3)-N(2)    | 116.55(15) |
| C(4)-C(3)-N(2)    | 120.73(14) |
| C(6)-C(5)-C(4)    | 121.03(16) |
| O(3)-N(2)-O(4)    | 124.34(15) |
| O(3)-N(2)-C(3)    | 119.29(14) |
| O(4)-N(2)-C(3)    | 116.33(14) |
| C(7)-C(12)-C(11)  | 120.84(16) |
| C(9)-C(8)-C(7)    | 120.66(16) |
| C(5)-C(6)-C(1)    | 119.16(16) |
| C(3)-C(2)-C(1)    | 117.29(16) |
| C(8)-C(9)-C(10)   | 122.02(16) |
| N(5)-C(10)-C(11)  | 123.36(16) |
| N(5)-C(10)-C(9)   | 120.88(16) |
| C(11)-C(10)-C(9)  | 115.75(15) |
| N(5)-C(14)-C(13)  | 109.36(16) |
| N(5)-C(14)-C(15)  | 107.01(15) |
| C(13)-C(14)-C(15) | 113.48(16) |
| O(6)-C(15)-C(14)  | 111.51(17) |
| O(5)-C(13)-C(14)  | 111.53(18) |
| O(9)-C(17)-C(16)  | 120.7(2)   |
| O(9)-C(17)-C(18)  | 122.7(2)   |
| C(16)-C(17)-C(18) | 116.6(2)   |

---

**Table S7.** torsion angles [deg] for **2a**

|                       |             |
|-----------------------|-------------|
| C(4)-N(3)-N(4)-C(7)   | 178.51(12)  |
| O(8)-N(6)-C(11)-C(12) | 0.1(2)      |
| O(7)-N(6)-C(11)-C(12) | 179.45(15)  |
| O(8)-N(6)-C(11)-C(10) | 179.80(16)  |
| O(7)-N(6)-C(11)-C(10) | -0.8(2)     |
| N(3)-N(4)-C(7)-C(12)  | 175.10(13)  |
| N(3)-N(4)-C(7)-C(8)   | -6.1(2)     |
| O(1)-N(1)-C(1)-C(2)   | 1.8(2)      |
| O(2)-N(1)-C(1)-C(2)   | -177.71(14) |
| O(1)-N(1)-C(1)-C(6)   | -179.52(14) |
| O(2)-N(1)-C(1)-C(6)   | 1.0(2)      |
| N(4)-N(3)-C(4)-C(5)   | 6.3(2)      |
| N(4)-N(3)-C(4)-C(3)   | -176.73(13) |
| C(5)-C(4)-C(3)-C(2)   | 0.1(2)      |
| N(3)-C(4)-C(3)-C(2)   | -177.08(14) |
| C(5)-C(4)-C(3)-N(2)   | 177.75(14)  |
| N(3)-C(4)-C(3)-N(2)   | 0.6(2)      |
| C(3)-C(4)-C(5)-C(6)   | 0.5(2)      |
| N(3)-C(4)-C(5)-C(6)   | 177.42(14)  |
| C(2)-C(3)-N(2)-O(3)   | -136.36(15) |
| C(4)-C(3)-N(2)-O(3)   | 45.8(2)     |

|                        |             |
|------------------------|-------------|
| C(2)-C(3)-N(2)-O(4)    | 41.73(19)   |
| C(4)-C(3)-N(2)-O(4)    | -136.09(15) |
| N(4)-C(7)-C(12)-C(11)  | 179.51(14)  |
| C(8)-C(7)-C(12)-C(11)  | 0.7(2)      |
| C(10)-C(11)-C(12)-C(7) | -1.6(2)     |
| N(6)-C(11)-C(12)-C(7)  | 178.10(14)  |
| C(12)-C(7)-C(8)-C(9)   | 1.0(2)      |
| N(4)-C(7)-C(8)-C(9)    | -177.74(15) |
| C(4)-C(5)-C(6)-C(1)    | -0.3(2)     |
| C(2)-C(1)-C(6)-C(5)    | -0.3(2)     |
| N(1)-C(1)-C(6)-C(5)    | -179.02(14) |
| C(4)-C(3)-C(2)-C(1)    | -0.7(2)     |
| N(2)-C(3)-C(2)-C(1)    | -178.49(14) |
| C(6)-C(1)-C(2)-C(3)    | 0.9(2)      |
| N(1)-C(1)-C(2)-C(3)    | 179.54(14)  |
| C(7)-C(8)-C(9)-C(10)   | -1.7(3)     |
| C(14)-N(5)-C(10)-C(11) | 173.76(17)  |
| C(14)-N(5)-C(10)-C(9)  | -7.7(3)     |
| C(12)-C(11)-C(10)-N(5) | 179.58(15)  |
| N(6)-C(11)-C(10)-N(5)  | -0.1(3)     |
| C(12)-C(11)-C(10)-C(9) | 0.9(2)      |
| N(6)-C(11)-C(10)-C(9)  | -178.79(14) |
| C(8)-C(9)-C(10)-N(5)   | -177.96(16) |
| C(8)-C(9)-C(10)-C(11)  | 0.7(2)      |
| C(10)-N(5)-C(14)-C(13) | -81.7(2)    |
| C(10)-N(5)-C(14)-C(15) | 155.05(18)  |
| N(5)-C(14)-C(15)-O(6)  | 50.0(2)     |
| C(13)-C(14)-C(15)-O(6) | -70.7(2)    |
| N(5)-C(14)-C(13)-O(5)  | 175.74(15)  |
| C(15)-C(14)-C(13)-O(5) | -64.9(2)    |

---

## References:

- (S1) Y. Marcus, *Chem. Soc. Rev.* 1994, **22**, 409.  
(S2) J. Catalán, *Handbook of Solvents*, G. Wypch (Ed.), ChemTech Publishing, Toronto, 2001, Chapter 9, p. 583.  
(S3) J. Catalán and H. Hopf, *Eur. J. Org. Chem.* 2004, 4694.  
(S4) G. M. Sheldrick, *Acta Cryst., Sect. A* 1990, **46**, 467.  
(S5) G. M. Sheldrick, *SHELXL-97, Programm for refinement of crystal structures*, University of Göttingen, 1997.
